# Supplementary material for: Psychometric Evaluation of the Vietnamese Version of the Child-OIDP Index Among Schoolchildren Aged 12–15 Years
Source: Research Square preprint supplement (doi:10.21203/rs.3.rs-8423823/v1), 2026-01-23
Supplement: Supplementary file 1 [file 854710ea6b6268da88dabdac.docx]

# Supplementary File 1. Reporting Checklists

This supplementary file contains the completed STROBE and COSMIN checklists for the manuscript entitled “Psychometric evaluation of the Vietnamese version of the Child Oral Impacts on Daily Performances (Child-OIDP) among adolescents aged 12–15 years”. Line numbers refer to the version of the manuscript with continuous line numbering enabled in Microsoft Word.

## Supplementary Table 1. STROBE checklist for cross-sectional studies

| STROBE Item | Recommendation | Manuscript section | Line numbers |
| --- | --- | --- | --- |
| 1(a) | Study design in title/abstract | Abstract – Methods | L45-51 |
| 1(b) | Informative abstract | Abstract | L39-65 |
| 2 | Background/rationale | Introduction | L69-94 |
| 3 | Objectives | End of Introduction | L94-99 |
| 4 | Study design | Methods – Study design | L101-109 |
| 5 | Setting | Methods – Study design | L101-109 |
| 6a | Eligibility criteria | Methods – Study design | L101-109 |
| 7 | Variables defined | Methods – Measures | L121-140 |
| 10 | Study size | Methods – Sample size | L141-145 |
| 12 | Statistical methods | Methods – Statistical analysis | L146-162 |
| 13 | Participants | Results – Participants | L165-169 |
| 14 | Descriptive data | Results – Tables 1–2 | L171-184 |
| 16 | Main results | Results – Validity analyses | L192-231 |
| 19 | Limitations | Discussion – Limitations | L265-269 |
| 21 | Generalisability | Discussion | L233-275 |

**Supplementary Table 2. COSMIN checklist for PROM validation studies**

| COSMIN Domain | Requirement | Manuscript section | Line numbers |
| --- | --- | --- | --- |
| PROM description | Instrument described | Introduction; Methods – Scoring | L69-99; L105-111 |
| Target population | Defined population | Abstract; Methods | L23-24; L128-134 |
| Translation | Forward–backward translation | Methods – Translation | L110-120 |
| Expert review | Content validity | Methods – Translation | L110-120 |
| Cognitive interviews | Comprehensibility testing | Methods – Translation | L110-120 |
| Sample size | Adequate for factor analysis | Methods – Sample size | L141-145 |
| Internal consistency | Cronbach’s alpha | Results – Reliability | L185-191 |
| Test–retest reliability | ICC | Methods & Results | L135-140; L188-189 |
| Structural validity | EFA & CFA | Results – Factor analysis | L192-209 |
| Construct validity | Hypothesis testing | Results – Concurrent validity | L210-219 |
| Discriminant validity | Clinical group comparison | Results – Discriminant validity | L220-231 |
| Limitations | Reported | Discussion – Limitations | L265-269 |
